# Supplementary material for: Diatomite-like KFeS2 for Use in High-Performance Electrodes for Energy Storage and Oxygen Evolution
Source: MDPI journal article supplement (doi:10.3390/nano13040643), 2023-02-06
Supplement: s1 [file s1]

# Diatomite-Like $\text{KFeS}_2$ for Use in High-Performance Electrodes for Energy Storage and Oxygen Evolution

Can Wang <sup>1</sup>, Kailin Li <sup>1</sup>, Qing Sun <sup>2</sup>, Shijin Zhu <sup>1</sup>, Chenzhi Zhang <sup>1</sup>, Yunhao Zhang <sup>3</sup>, Zhongyi Shi <sup>4</sup>, Youzhong Hu <sup>1</sup> and Yuxin Zhang <sup>1,\*</sup>

<sup>1</sup> College of Materials Science and Engineering, Chongqing University, Chongqing 400044, China

<sup>2</sup> Multi-scale Porous Materials Center, School of Chemistry and Chemical Engineering, Chongqing University, Chongqing 400044, China

<sup>3</sup> School of Energy and Power Engineering, Chongqing University, Chongqing 400044, China

<sup>4</sup> Undergraduate School, Chongqing University, Chongqing 400044, China

\* Correspondence: zhangyuxin@cqu.edu.cn

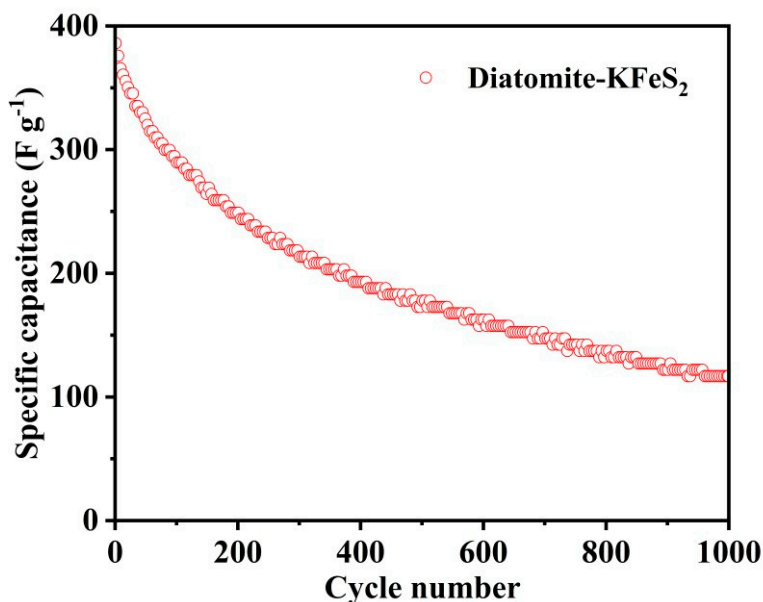

Figure S1. cycle performance of diatomite-like  $\text{KFeS}_2$ .
